# Supplementary material for: Fabrication of porous MnO microspheres with carbon coating for lithium ion battery application
Source: Royal Society of Chemistry journal article supplement (doi:10.1039/c3ce42247j), 2013-12-16
Supplement: c3ce42247j.pdf [file c3ce42247j.pdf]

## Fabrication of Porous MnO Microspheres with Carbon Coating for Lithium-ion Battery Application

Xinzhen Wang, Song Qiu, Guixia Lu, Cuizhu He, Jiurong Liu,\* Liqiang Luan, and  
Wei Liu,\*

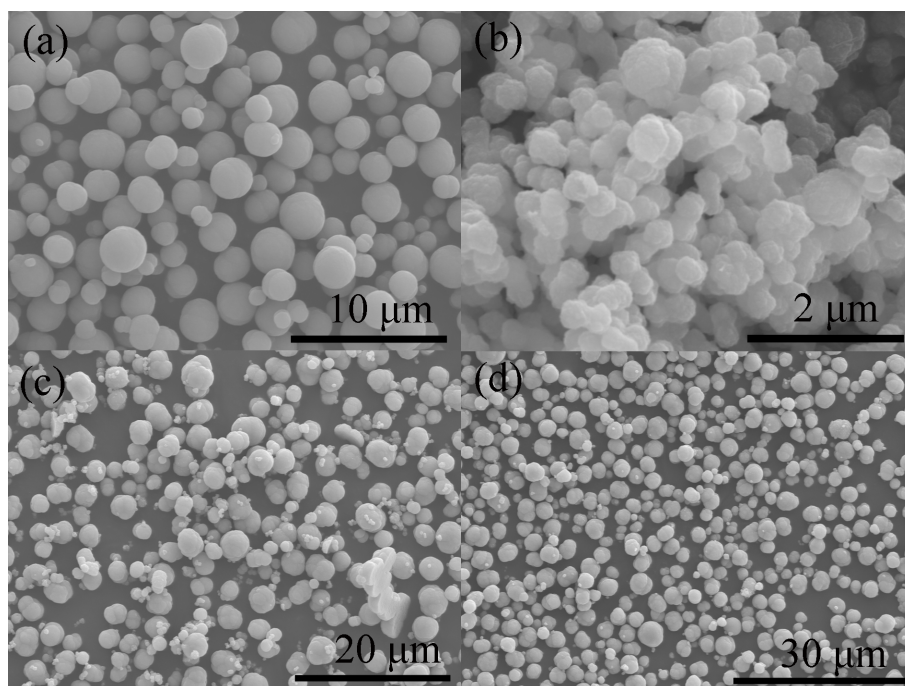

**Fig. S1** SEM images of porous  $\text{Mn}_2\text{O}_3$  microspheres prepared (a) without PSS, (b) with 1.5 g PVP, 1.5 g P123 (c), and 1.5 g PEG (d).
